# Supplementary material for: Roles of pH, ionic strength, and sulfate in the aqueous nitrate-mediated photooxidation of green leaf volatiles
Source: Copernicus journal article supplement (doi:10.5194/acp-25-10731-2025), 2025-09-18
Supplement: Supplementary file 1 [file acp-25-10731-2025-supplement.pdf]

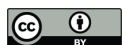

*Supplement of*

## **Roles of pH, ionic strength, and sulfate in the aqueous nitrate-mediated photooxidation of green leaf volatiles**

**Yuting Lyu et al.**

*Correspondence to:* Theodora Nah ([theodora.nah@cityu.edu.hk](mailto:theodora.nah@cityu.edu.hk))

The copyright of individual parts of the supplement might differ from the article licence.

## S1. Measurement of p-hydroxybenzoic acid

p-hydroxybenzoic acid, which is formed from the reaction of  $\cdot\text{OH}$  with BA ( $k_{\text{BA}+\text{OH}} = 5.9 \times 10^9 \text{ M}^{-1} \text{ s}^{-1}$  (Herrmann et al., 2010)) at a yield of 0.17 (Anastasio and McGregor, 2001), was measured in separate experiments using an ultra-high performance liquid chromatography system (1290 system, Agilent) coupled to a high-resolution quadrupole-time-of-flight mass spectrometer (X500R QTOF MS/MS, Sciex) (UPLC-MS) equipped with an electrospray ionization (ESI) source that was operated in negative mode. A reverse phase Kinetex (Phenomenex) Polar C18 column (2.6  $\mu\text{m}$ ,  $150 \times 2.1 \text{ mm}$ ) equipped with a Polar C18 guard column was used for UPLC-MS analysis. The temperatures for the column oven and the UPLC autosampler were set to 25  $^{\circ}\text{C}$ . A gradient elution program was used. For the mobile phase, eluent A was 10 mM ammonia acetate in Milli-Q water buffered with 0.03% acetic acid, and eluent B was pure methanol. A gradient elution program was used, and it was delivered at a flow rate of 0.3  $\text{mL min}^{-1}$ . The following mobile phase gradient was used for the detection of BA and its product PHBA: 0 to 3 min 1% B, 3 to 5 min linear rise to 80% B and hold to 6 min, 6 to 6.5 min linear drop to 1% B and then hold to 10 min for equilibrium. The sample injection volume was set to 10  $\mu\text{L}$ . The following tandem MS conditions were used: -4500 V ESI ion spray voltage, 80 V declustering potential, -20 V collision energy, 50 psi ion source gas, 25 psi curtain gas, and 450  $^{\circ}\text{C}$  source temperature.

Solid phase extraction (SPE) was performed to desalt the samples using two different types of SPE cartridges: Oasis MAX (60 mg, 3 cc, 60  $\mu\text{m}$ , Waters) and Bond PPL Elut (200 mg, 3 mL, 125  $\mu\text{m}$ , Agilent). First, the sorbent was conditioned and equilibrated using 3 mL of methanol (LC-MS grade) followed by 3 mL of Milli-Q water. Next, the cartridge was loaded with 3 mL of  $1\times$  diluted sample solution and then purged with 6 mL of Milli-Q water. A vacuum pump was used to dry out the sorbent before elution using 3 mL of 2% formic acid in methanol. All the desalted samples were filtered using 0.2  $\mu\text{m}$  nylon syringe filters to remove any particulates prior to UPLC-MS analysis.

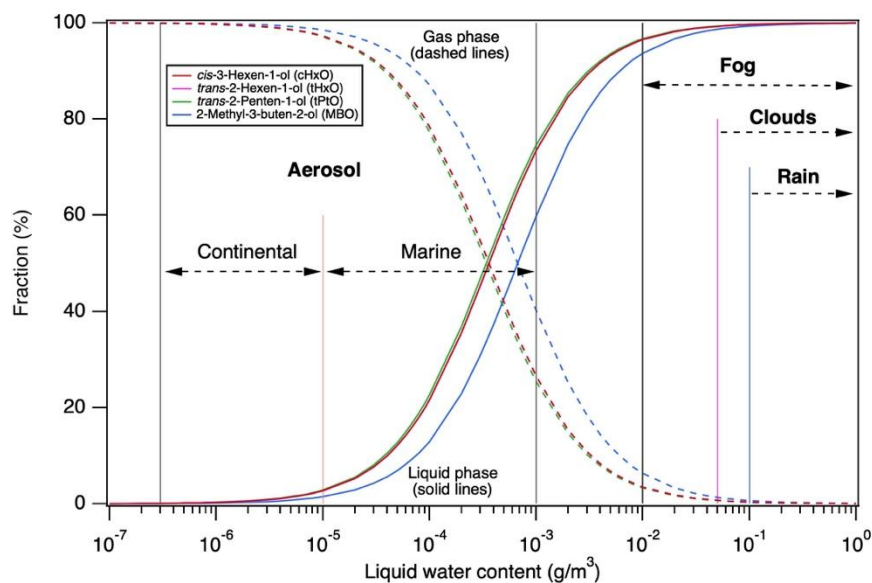

**Figure S1.** Calculated partitioning of the GLVs between the gas and aqueous phases as a function of liquid water content. The Henry's law solubility coefficients used for the calculation of cHxO, tHxO, tPtO, and MBO were  $113 \text{ M atm}^{-1}$ ,  $94 \text{ M atm}^{-1}$ ,  $120 \text{ M atm}^{-1}$ , and  $61 \text{ M atm}^{-1}$ , respectively (Sarang et al., 2021; Sander, 2023).

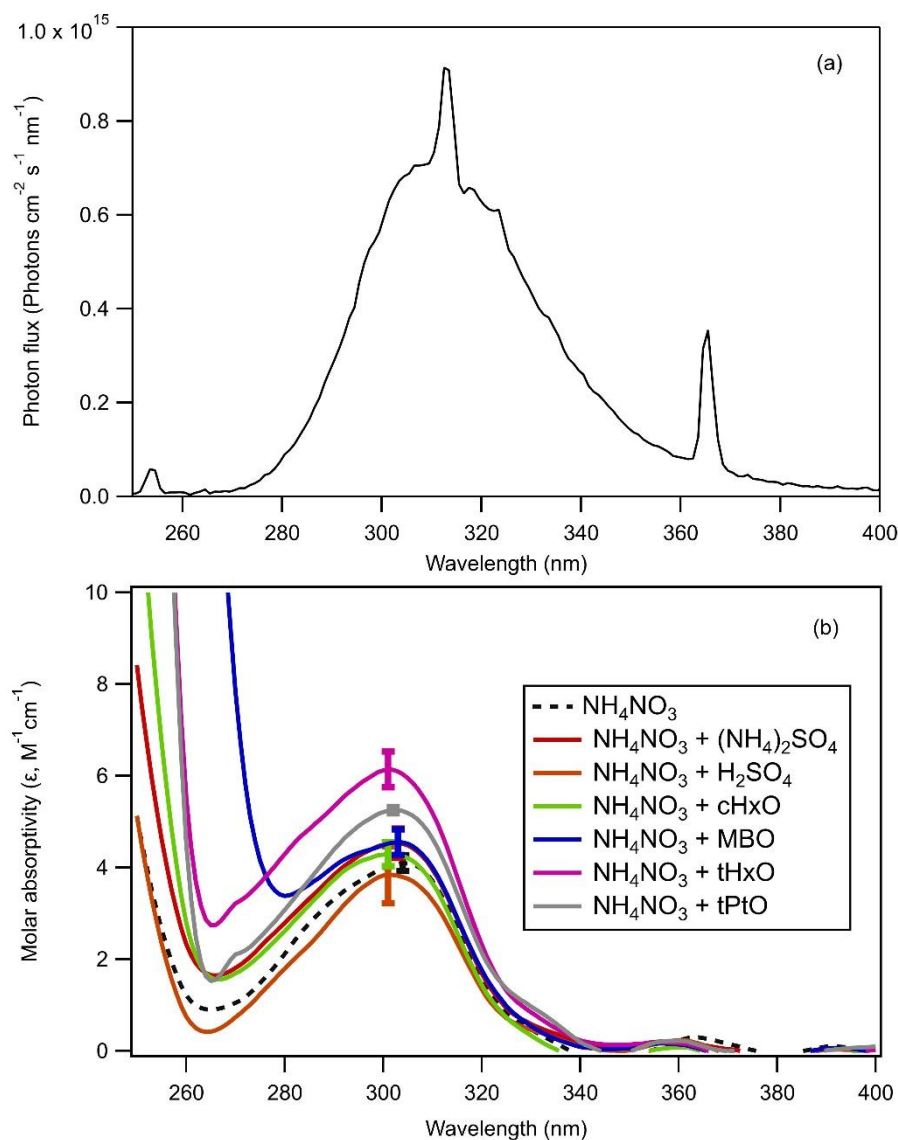

66

67 **Figure S2.** (a) Photon flux inside the Rayonet photoreactor under our experimental conditions  
 68 (black solid line), and (b) molar absorptivities ( $\epsilon$ ) of the solutions of 25 mM  $\text{NH}_4\text{NO}_3$  (black  
 69 dotted line) and 25 mM  $\text{NH}_4\text{NO}_3$  mixed with 1085 mM  $(\text{NH}_4)_2\text{SO}_4$  (red solid line), 0.5 mM  
 70  $\text{H}_2\text{SO}_4$  (orange solid line), 10 mM cHxO (green solid line), 10 mM MB (blue solid line), 10  
 71 mM tHxO (pink solid line), and 10 mM tPtO (grey solid line). Also shown are the error bars of  
 72 the peak molar absorptivities of the different solutions. The error bars represent one standard  
 73 deviation originating from triplicate absorption measurements. Only the addition of tPtO and  
 74 tHxO were found to have significant effects on the peak molar absorptivities of  $\text{NH}_4\text{NO}_3$  ( $p <$   
 75 0.05).

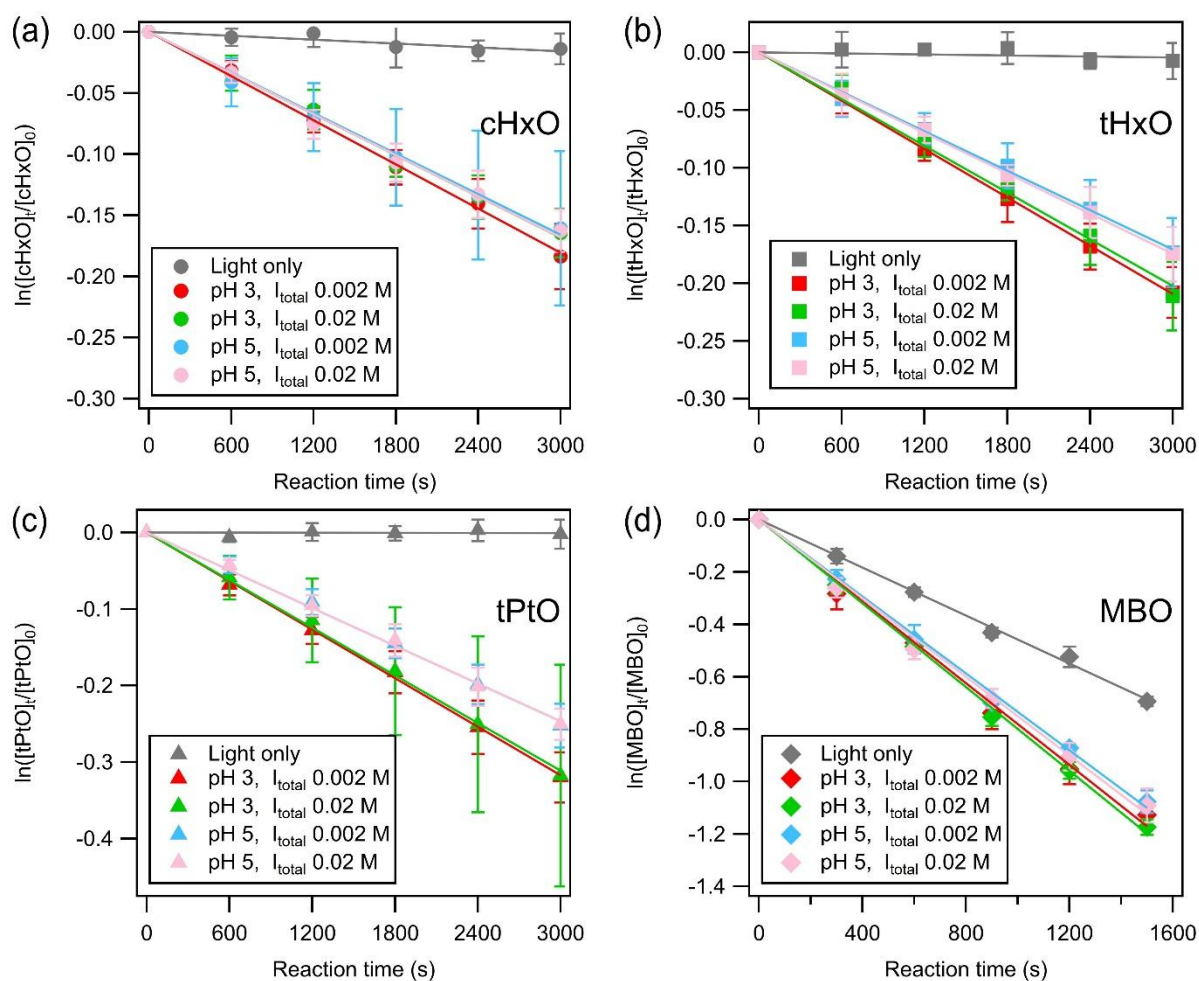

76

77 **Figure S3.** Decays of the GLVs in the absence (“Light only”) and presence of nitrate and  
 78 sulfate under cloud/fog-like conditions (Table 1). The error bars represent one standard  
 79 deviation originating from triplicate experiments and triplicate measurements at each reaction  
 80 time. The  $k_{obs}$  for MBO at different pH and ionic strengths were corrected by subtracting the  
 81 loss rates from control experiments conducted in the absence of nitrate and sulfate (“Light  
 82 only” experiments).

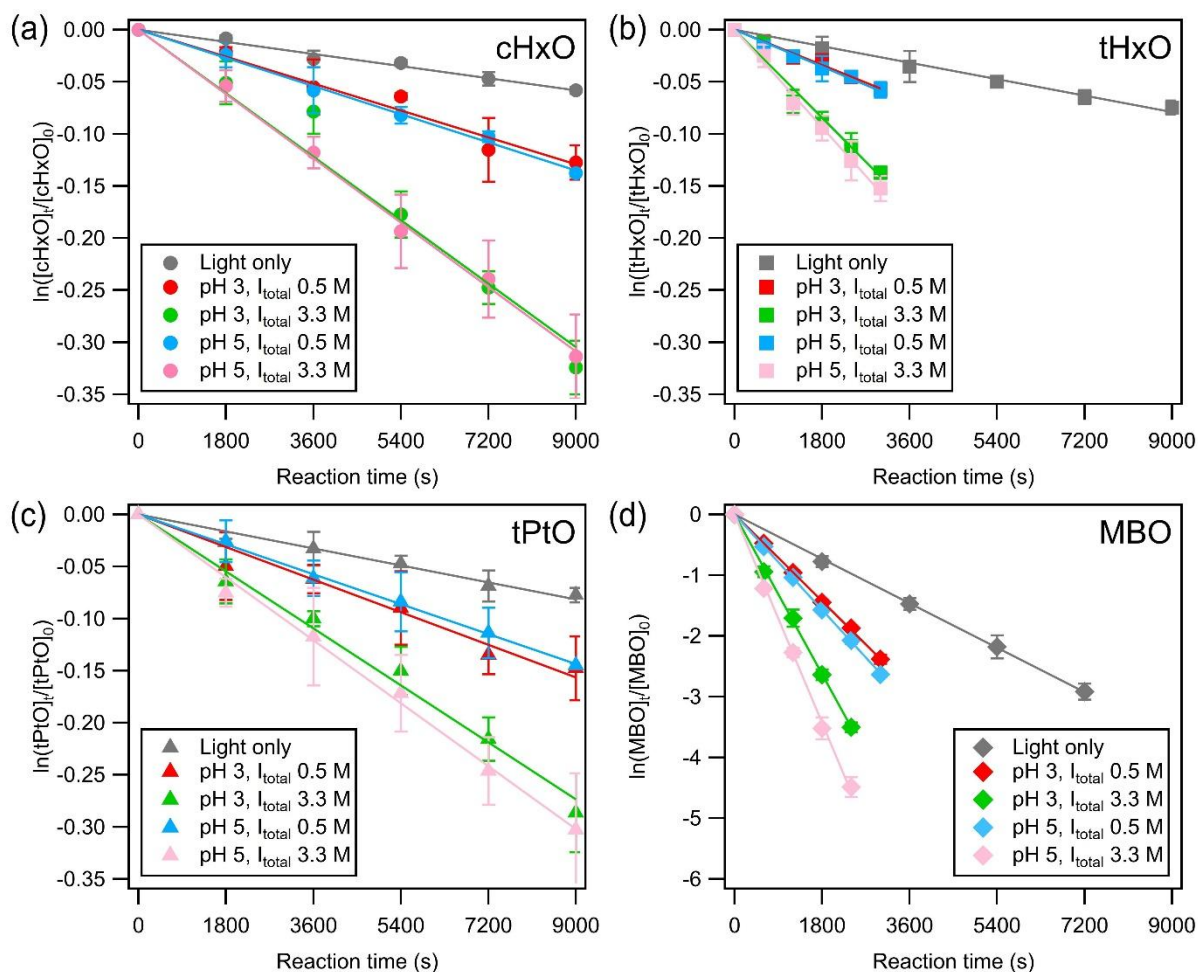

**Figure S4.** Decays of the GLVs in the absence (“Light only”) and presence of nitrate and sulfate under aqueous aerosol-like conditions (Table 1). The error bars represent one standard deviation originating from triplicate experiments and triplicate measurements at each reaction time. The  $k_{obs}$  for the four GLVs at different pH and ionic strengths were corrected by subtracting the loss rates from control experiments conducted in the absence of nitrate and sulfate (“Light only” experiments).

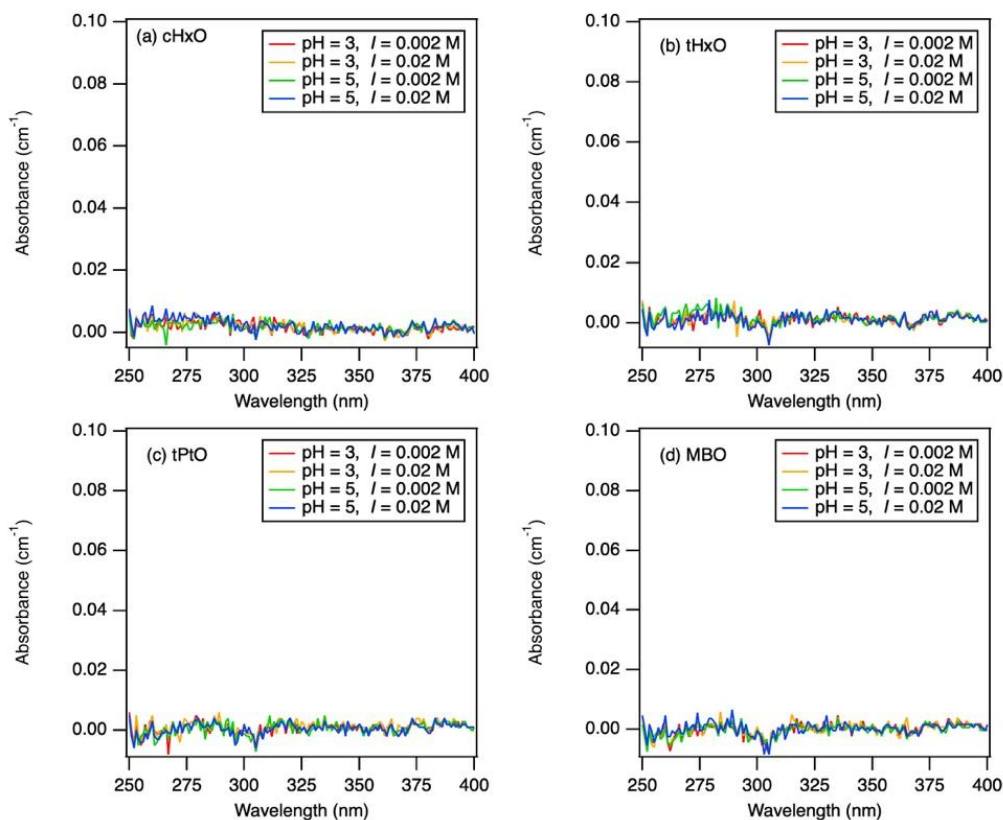

90

91 **Figure S5.** Light absorption spectra of the four GLVs at different ionic strengths under  
 92 cloud/fog-like condition. The GLV concentrations were set to 0.1 mM, and the ionic strength  
 93 of the solutions were adjusted with only  $\text{H}_2\text{SO}_4$  and  $(\text{NH}_4)_2\text{SO}_4$ . The absorbances of all the  
 94 solutions were weak in the spectral region of the light output in the Rayonet photoreactor  
 95 (Figure S2).

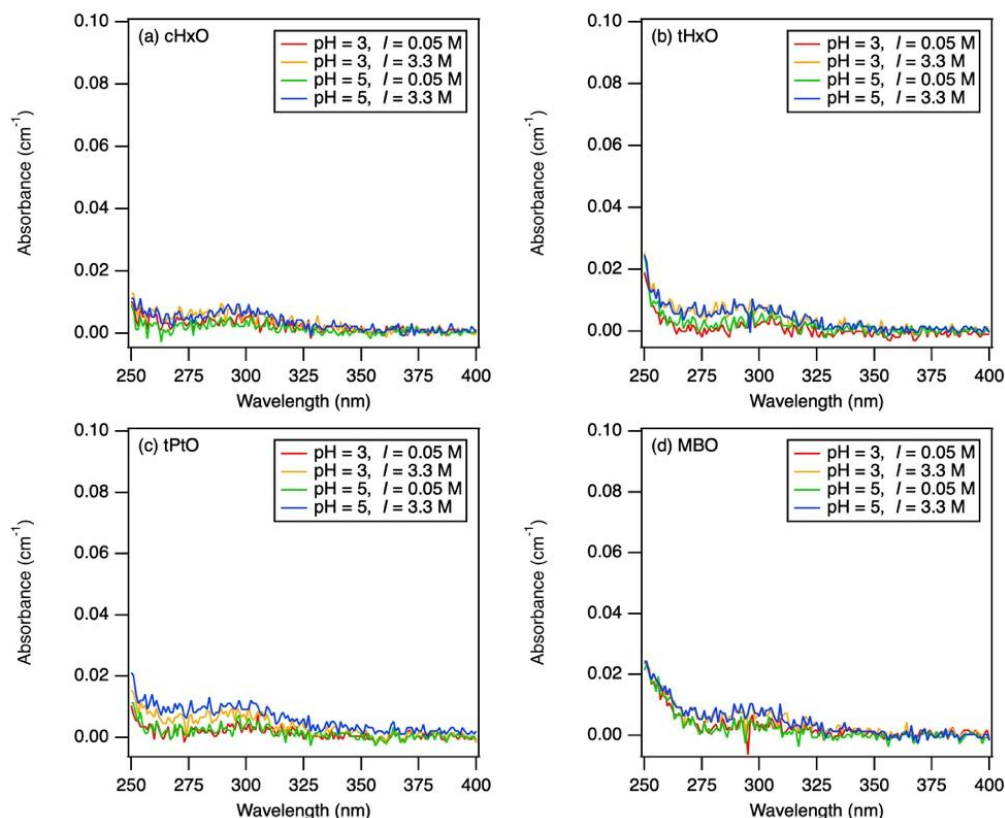

**Figure S6.** Light absorption spectra of the four GLVs at different ionic strengths under cloud/fog-like condition. The GLV concentrations were set to 0.1 mM, and the ionic strength of the solutions were adjusted with only  $\text{H}_2\text{SO}_4$  and  $(\text{NH}_4)_2\text{SO}_4$ . The slightly increased absorption from 275 to 325 nm could be due to the additions of large amounts of  $(\text{NH}_4)_4\text{SO}_4$  (Cope et al., 2022). In general, the absorbances of all the solutions were weak in the spectral region of the light output in the Rayonet photoreactor (Figure S2).

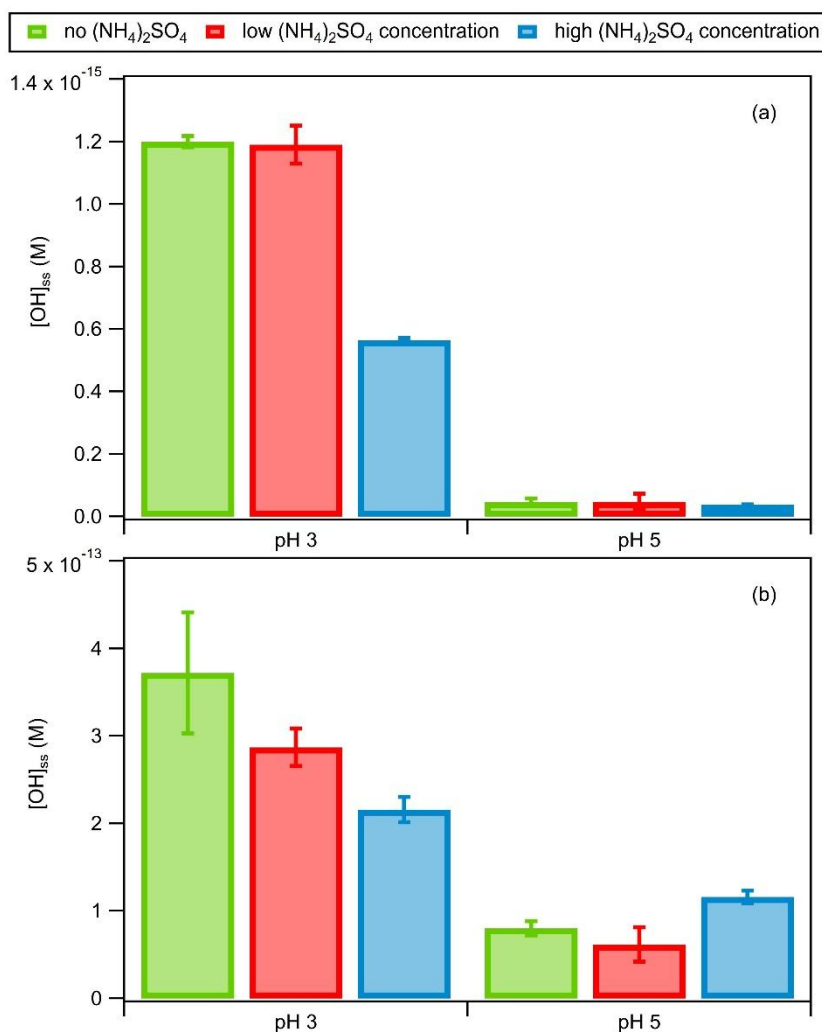

103

104 **Figure S7.** Estimated  $[\cdot\text{OH}]_{\text{ss}}$  in nitrate-mediated photooxidation experiments under (a)  
 105 cloud/fog-like, and (b) aqueous aerosol-like conditions. These values were obtained from a  
 106 separate set of experiments (i.e., GLVs were not present in the solutions) using benzoic acid  
 107 (10  $\mu\text{M}$ ) as the  $\cdot\text{OH}$  probe compound and measuring the formation of p-hydroxybenzoic acid  
 108 from the reaction of  $\cdot\text{OH}$  with BA (Lyu et al., 2023; Yang et al., 2021; Yang et al., 2023). The  
 109 error bars represent one standard deviation originating from triplicate experiments and  
 110 triplicate measurements. For the low  $(\text{NH}_4)_2\text{SO}_4$  concentration conditions (red bars), 0.135 mM  
 111 and 0.583 mM of  $(\text{NH}_4)_2\text{SO}_4$  was added into the solutions for pH 3 and 5, respectively, for  
 112 cloud/fog-like conditions, whereas 158 mM of  $(\text{NH}_4)_2\text{SO}_4$  was added into the solutions for both  
 113 pH 3 and 5 for aqueous aerosol-like conditions (Table 1). For the high  $(\text{NH}_4)_2\text{SO}_4$  concentration  
 114 conditions (blue bars), 6.135 mM and 6.580 mM of  $(\text{NH}_4)_2\text{SO}_4$  was added into the solutions  
 115 for pH 3 and 5, respectively, for cloud/fog-like conditions, whereas 1085 mM was added into  
 116 the solutions for both pH 3 and 5 for aqueous aerosol-like conditions (Table 1). At present, it

is unclear why the  $[\cdot\text{OH}]_{\text{ss}}$  increased with  $(\text{NH}_4)_2\text{SO}_4$  concentration at pH 5 under aqueous aerosol-like conditions.

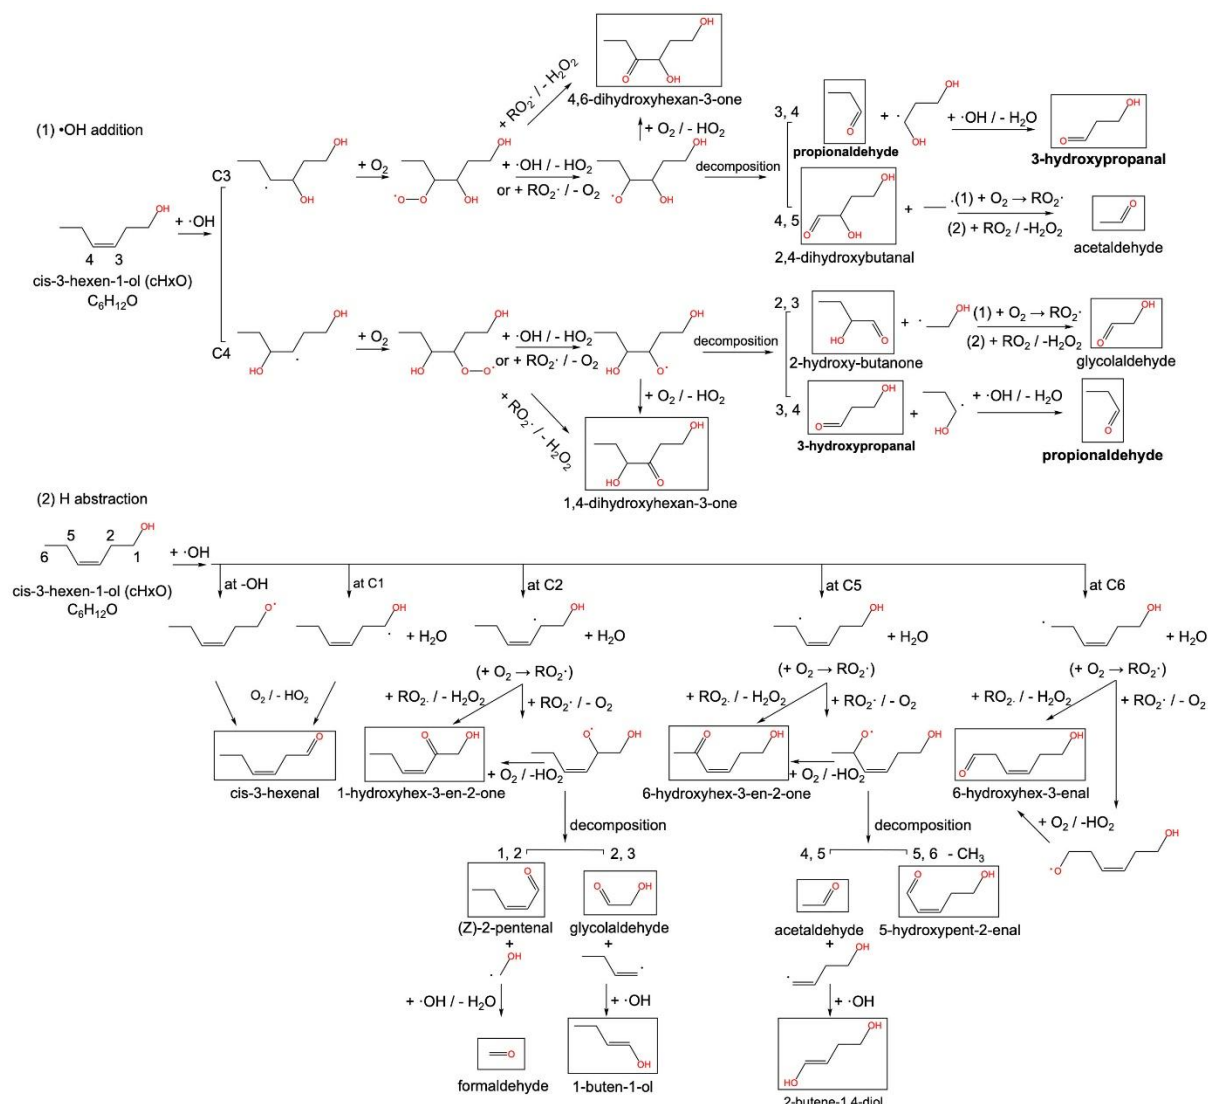

119

**Figure S8.** The proposed reaction mechanism and first-generation products via (1)  $\cdot\text{OH}$  addition, and (2) H abstraction for the oxidation cHxO by  $\cdot\text{OH}$  in the aqueous phase based on the existing literature (Reisen et al., 2003; Sarang et al., 2023). Similar reaction mechanisms are expected for the  $\cdot\text{OH}$  oxidation of tHxO and tPtO given their similar molecular structures. The expected products are shown in boxes, while expected key products are highlighted in boldface. Note that  $\cdot\text{OH}$  can also react with organic compounds through electron transfer pathways, which are not included here due to their expected minor roles in oxidation with GLVs. Bimolecular combination reaction pathways involving  $\text{RO}_2\cdot$  and  $\text{RO}\cdot$  (e.g.,  $\text{RO}_2\cdot + \text{RO}_2\cdot$ ) that lead to oligomer formation are also not known here.

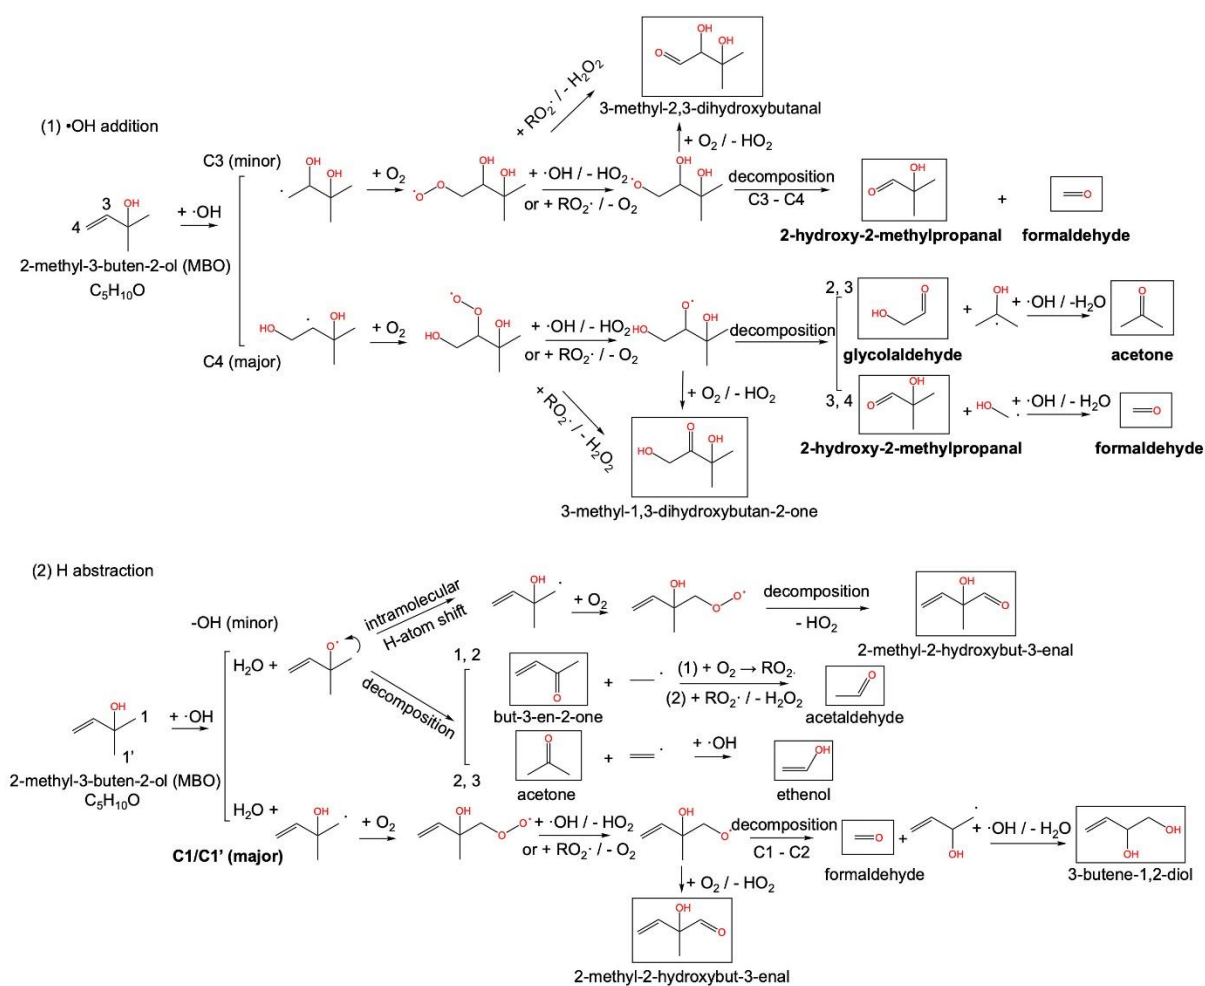

129

130 **Figure S9.** The proposed reaction mechanism and first generation products via (1)  $\cdot\text{OH}$   
 131 addition and (2) H abstraction for the oxidation MBO by  $\cdot\text{OH}$  in the aqueous phase based on  
 132 the existing literature (Atkinson and Arey, 2003; Carrasco et al., 2007; Chan et al., 2009;  
 133 Reisen et al., 2003; Sarang et al., 2023). The expected products are shown in boxes, while  
 134 expected key products are highlighted in boldface. Note that  $\cdot\text{OH}$  can also react with MBO  
 135 through electron transfer pathways, which are not included here due to their expected minor  
 136 roles in oxidation with GLVs. Bimolecular combination reaction pathways involving  $\text{RO}_2\cdot$  and  
 137  $\text{RO}\cdot$  (e.g.,  $\text{RO}_2\cdot + \text{RO}_2\cdot$ ) that lead to oligomer formation are also not known here.

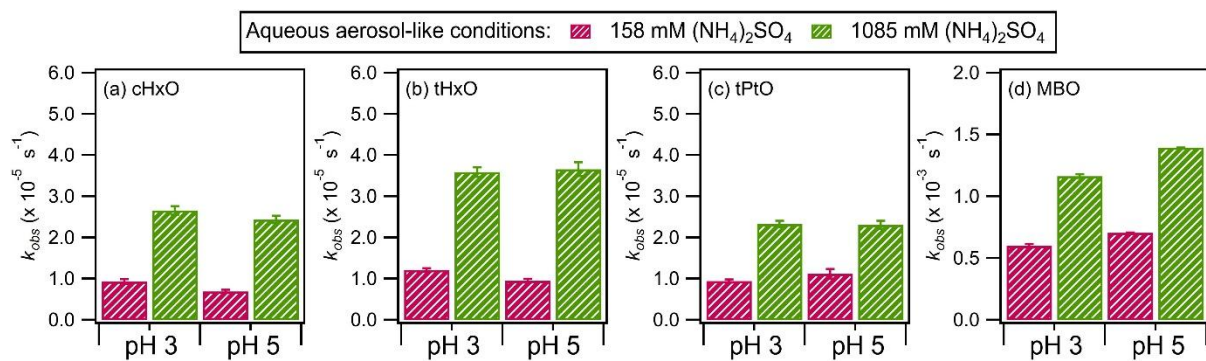

**Figure S10.** The  $k_{obs}$  values for the decays of the four GLVs upon irradiation when only sulfate (in the form of (NH<sub>4</sub>)<sub>2</sub>SO<sub>4</sub> and (for pH 3) H<sub>2</sub>SO<sub>4</sub>) was present in the solutions. The error bars represent one standard deviation originating from triplicate experiments and measurements.

**Table S1.** List of reactions pathways initiated by the aqueous photolysis of nitrate compiled from the literature (Gligorovski et al., 2015; Herrmann, 2007; Mack and Bolton, 1999; Marussi and Vione, 2021; Scharko et al., 2014).

| No. | Reactions                                                                                                   | Quantum yield ( $\Phi$ )/<br>Acid dissociation constant ( $pK_a$ ) |
|-----|-------------------------------------------------------------------------------------------------------------|--------------------------------------------------------------------|
| 1   | $\text{NO}_3^- + h\nu \rightarrow [\text{NO}_2\bullet + \text{O}\bullet^-]_{\text{cage}}$                   | $\Phi = 0.01$                                                      |
| 2   | $[\text{NO}_2\bullet + \text{O}\bullet^-]_{\text{cage}} \rightarrow \text{NO}_2\bullet + \text{O}\bullet^-$ | —                                                                  |
| 3   | $\text{O}\bullet^- + \text{H}_2\text{O} \rightleftharpoons \bullet\text{OH} + \text{OH}^-$                  | $pK_a(\bullet\text{OH}) = 11.9$                                    |
| 4   | $[\text{NO}_2\bullet + \text{O}\bullet^-]_{\text{cage}} \rightarrow \text{OONO}^-$                          | —                                                                  |
| 5   | $\text{OONO}^- + \text{H}^+ \rightleftharpoons \text{HOONO}$                                                | $pK_a = 7$                                                         |
| 6   | $\text{HOONO} \rightarrow \bullet\text{OH} + \text{NO}_2\bullet$                                            | —                                                                  |
| 7   | $2\text{NO}_2\bullet \rightleftharpoons \text{N}_2\text{O}_4$                                               | —                                                                  |
| 8   | $\text{N}_2\text{O}_4 + \text{H}_2\text{O} \rightarrow \text{HNO}_2 + \text{NO}_3^- + \text{H}^+$           | —                                                                  |
| 9   | $\text{HNO}_2 \rightleftharpoons \text{H}^+ + \text{NO}_2^-$                                                | $pK_a = \sim 3.3$                                                  |
| 10  | $\text{NO}_2^- + h\nu \rightarrow \text{NO}\bullet + \text{O}\bullet^-$                                     | $\Phi = 0.025\text{--}0.065$                                       |
| 11  | $\text{NO}_2^- + h\nu \rightarrow \text{NO}_2\bullet + \text{e}^-$                                          | $\Phi = \sim 0.001$                                                |
| 12  | $\text{NO}_2^- + \bullet\text{OH} \rightarrow \text{NO}_2\bullet + \text{OH}^-$                             | —                                                                  |
| 13  | $\text{NO}\bullet + \text{NO}_2\bullet \rightleftharpoons \text{N}_2\text{O}_3$                             | —                                                                  |
| 14  | $\text{N}_2\text{O}_3 + \text{H}_2\text{O} \rightarrow 2 \text{NO}_2^- + 2 \text{H}^+$                      | —                                                                  |
| 15  | $\text{HNO}_2 + h\nu \rightarrow \text{NO}\bullet + \bullet\text{OH}$                                       | $\Phi = 0.35$                                                      |
| 16  | $\text{HNO}_2 + \bullet\text{OH} \rightarrow \text{NO}_2\bullet + \text{H}_2\text{O}$                       | —                                                                  |
| 17  | $2 \text{HNO}_2 \rightarrow \text{NO}\bullet + \text{NO}_2\bullet + \text{H}_2\text{O}$                     | —                                                                  |

**Table S2.** List of  $k_{obs}$  and one lifetime (i.e.,  $\tau = \frac{1}{k_{obs}}$ , when 37 % of the initial concentration of the GLV remained) of GLVs during nitrate-mediated photooxidation under cloud/fog-like conditions (Table 1).

| GLVs                          | cHxO                         |              | tHxO                         |              | tPtO                         |              | MBO                          |              |
|-------------------------------|------------------------------|--------------|------------------------------|--------------|------------------------------|--------------|------------------------------|--------------|
|                               | $k_{obs}$ (s <sup>-1</sup> ) | $\tau$ (min) |
| pH 3<br>$I_{total} = 0.002$ M | $6.02 \times 10^{-5}$        | 277          | $6.98 \times 10^{-5}$        | 239          | $1.06 \times 10^{-4}$        | 158          | $3.23 \times 10^{-4}$        | 52           |
| pH 3<br>$I_{total} = 0.02$ M  | $5.61 \times 10^{-5}$        | 297          | $6.74 \times 10^{-5}$        | 247          | $1.04 \times 10^{-4}$        | 161          | $3.41 \times 10^{-4}$        | 49           |
| pH 5<br>$I_{total} = 0.002$ M | $5.5 \times 10^{-5}$         | 301          | $5.69 \times 10^{-5}$        | 293          | $8.22 \times 10^{-5}$        | 203          | $2.76 \times 10^{-4}$        | 60           |
| pH 5<br>$I_{total} = 0.02$ M  | $5.6 \times 10^{-5}$         | 298          | $5.82 \times 10^{-5}$        | 287          | $8.23 \times 10^{-5}$        | 203          | $2.92 \times 10^{-4}$        | 57           |

**Table S3.** List of  $k_{obs}$  and one lifetime (i.e.,  $\tau = \frac{1}{k_{obs}}$ , when 37 % of the initial concentration of the GLV remained) of GLVs during nitrate-mediated photooxidation under aqueous aerosol-like conditions (Table 1).

| GLVs                        | cHxO                         |              | tHxO                         |              | tPtO                         |              | MBO                          |              |
|-----------------------------|------------------------------|--------------|------------------------------|--------------|------------------------------|--------------|------------------------------|--------------|
|                             | $k_{obs}$ (s <sup>-1</sup> ) | $\tau$ (min) |
| pH 3<br>$I_{total} = 0.5$ M | $7.91 \times 10^{-6}$        | 2108         | $1.00 \times 10^{-5}$        | 1663         | $1.74 \times 10^{-5}$        | 959          | $3.86 \times 10^{-4}$        | 43           |
| pH 3<br>$I_{total} = 3.3$ M | $2.74 \times 10^{-5}$        | 608          | $3.82 \times 10^{-5}$        | 437          | $3.04 \times 10^{-5}$        | 548          | $1.05 \times 10^{-3}$        | 16           |
| pH 5<br>$I_{total} = 0.5$ M | $8.55 \times 10^{-6}$        | 1949         | $1.08 \times 10^{-5}$        | 1538         | $1.60 \times 10^{-5}$        | 1045         | $4.65 \times 10^{-4}$        | 36           |
| pH 5<br>$I_{total} = 3.3$ M | $2.78 \times 10^{-5}$        | 599          | $4.32 \times 10^{-5}$        | 386          | $3.36 \times 10^{-5}$        | 497          | $1.50 \times 10^{-3}$        | 11           |

**Table S4.** List of reactions pathways hypothesized to be associated with the aqueous photolysis of sulfate compiled from the literature (Cope et al., 2022; De Semainville et al., 2007; Herrmann et al., 1999). Note that the mechanisms behind the formation of sulfur containing radicals from the aqueous photolysis of (NH<sub>4</sub>)<sub>2</sub>SO<sub>4</sub> are still unknown.

| No. | Reactions                                                                                                  |
|-----|------------------------------------------------------------------------------------------------------------|
| 1   | $\text{SO}_4^{2-} + \text{H}^+ \rightleftharpoons \text{HSO}_4^-$                                          |
| 2   | $\bullet\text{OH} + \text{HSO}_4^- \rightarrow \text{SO}_4^{\bullet-} + \text{H}_2\text{O}$                |
| 3   | $\text{SO}_4^{\bullet-} + \text{SO}_4^{\bullet-} \rightarrow \text{S}_2\text{O}_8^{2-}$                    |
| 4   | $\text{SO}_4^{\bullet-} + \text{HO}_2\bullet \rightarrow \text{SO}_4^{2-} + \text{H}^+ + \text{O}_2$       |
| 5   | $\text{SO}_4^{\bullet-} + \text{O}_2^- \rightarrow \text{SO}_4^{2-} + \text{O}_2$                          |
| 6   | $\text{SO}_4^{\bullet-} + \text{OH}^- \rightarrow \text{SO}_4^{2-} + \bullet\text{OH}$                     |
| 7   | $\text{SO}_4^{\bullet-} + \text{H}_2\text{O} \rightarrow \text{SO}_4^{2-} + \text{H}^+ + \bullet\text{OH}$ |
| 8   | $\text{S}_2\text{O}_8^{2-} + h\nu \rightarrow 2\text{SO}_4^{\bullet-}$                                     |
| 9   | $\text{SO}_4^{\bullet-} + \text{NO}_3^- \rightarrow \text{SO}_4^{2-} + \text{NO}_3\bullet$                 |

**Table S5.** Previously reported second-order reaction rate constants for the GLVs against  $\bullet\text{OH}$ ,  $\text{SO}_4^{\bullet-}$ , and  $\text{NO}_3\bullet$ .

| GLVs                       | Oxidant                  | Rate constant<br>( $\times 10^{-9} \text{ M}^{-1} \text{ s}^{-1}$ ) | Temp.<br>(K) | pH  | Reference                         |
|----------------------------|--------------------------|---------------------------------------------------------------------|--------------|-----|-----------------------------------|
| cHxO                       | $\bullet\text{OH}$       | $5.1 \pm 0.8$                                                       | 298          | 3.1 | (Richards-Henderson et al., 2014) |
|                            |                          | $5.3 \pm 0.3$                                                       |              | 5.4 |                                   |
|                            |                          | $5.3 \pm 0.2$                                                       |              | 6.9 |                                   |
| MBO                        | $\bullet\text{OH}$       | $7.5 \pm 1.4$                                                       | 298          | 3.1 | (Richards-Henderson et al., 2014) |
|                            |                          | $8.0 \pm 0.6$                                                       |              | 5.4 |                                   |
|                            |                          | $7.3 \pm 0.7$                                                       |              | 6.9 |                                   |
| 1-peten-3-ol               | $\bullet\text{OH}$       | $6.3 \pm 0.1$                                                       | 298          | 7   | (Sarang et al., 2021)             |
|                            | $\text{SO}_4^{\bullet-}$ | $0.94 \pm 0.10$                                                     |              |     |                                   |
|                            | $\text{NO}_3\bullet$     | $0.15 \pm 0.015$                                                    |              |     |                                   |
| <i>cis</i> -2-hexen-1-ol   | $\bullet\text{OH}$       | $6.7 \pm 0.3$                                                       | 298          | 7   | (Sarang et al., 2021)             |
|                            | $\text{SO}_4^{\bullet-}$ | $2.5 \pm 0.3$                                                       |              |     |                                   |
|                            | $\text{NO}_3\bullet$     | $0.84 \pm 0.23$                                                     |              |     |                                   |
| <i>trans</i> -2-hexen-1-al | $\bullet\text{OH}$       | $4.8 \pm 0.3$                                                       | 298          | 7   | (Sarang et al., 2021)             |
|                            | $\text{SO}_4^{\bullet-}$ | $0.48 \pm 0.02$                                                     |              |     |                                   |
|                            | $\text{NO}_3\bullet$     | $0.03 \pm 0.07$                                                     |              |     |                                   |

169 **Table S6.** Statistical analyses (student's  $t$  test) for the differences in  $k_{obs}$  at different pH and  
170 ionic strengths under cloud/fog-like conditions for cHxO (Figure 2 in the main text).

| cHxO                  | pH 3                  | pH 3                 | pH 5                  | pH 5                 |
|-----------------------|-----------------------|----------------------|-----------------------|----------------------|
|                       | $I_{total} = 0.002$ M | $I_{total} = 0.02$ M | $I_{total} = 0.002$ M | $I_{total} = 0.02$ M |
| pH 3                  |                       |                      |                       |                      |
| $I_{total} = 0.002$ M | /                     | N.S.S.               | $p < 0.05$            | N.S.S.               |
| pH 3                  |                       |                      |                       |                      |
| $I_{total} = 0.02$ M  | N.S.S.                | /                    | N.S.S.                | N.S.S.               |
| pH 5                  |                       |                      |                       |                      |
| $I_{total} = 0.002$ M | $p < 0.05$            | N.S.S.               | /                     | N.S.S.               |
| pH 5                  |                       |                      |                       |                      |
| $I_{total} = 0.02$ M  | N.S.S.                | N.S.S.               | N.S.S.                | /                    |

171 Note: If the  $p$  value is smaller than 0.05, this indicates that the difference between the two  
172 variables in the student's  $t$  test is statistically significant. Conversely, if the  $p$  value is larger  
173 than 0.05, this indicates that the difference is not statically significant (N.S.S.).

**Table S7.** Statistical analyses (student's  $t$  test) for the differences in  $k_{obs}$  at different pH and ionic strengths under cloud/fog-like conditions for tHxO (Figure 2 in the main text).

| tHxO                  | pH 3                  | pH 3                 | pH 5                  | pH 5                 |
|-----------------------|-----------------------|----------------------|-----------------------|----------------------|
|                       | $I_{total} = 0.002$ M | $I_{total} = 0.02$ M | $I_{total} = 0.002$ M | $I_{total} = 0.02$ M |
| pH 3                  | /                     | N.S.S.               | $p < 0.05$            | $p < 0.05$           |
| $I_{total} = 0.002$ M |                       |                      |                       |                      |
| pH 3                  | N.S.S.                | /                    | $p < 0.05$            | $p < 0.05$           |
| $I_{total} = 0.02$ M  |                       |                      |                       |                      |
| pH 5                  | $p < 0.05$            | $p < 0.05$           | /                     | N.S.S.               |
| $I_{total} = 0.002$ M |                       |                      |                       |                      |
| pH 5                  | $p < 0.05$            | $p < 0.05$           | N.S.S.                | /                    |
| $I_{total} = 0.02$ M  |                       |                      |                       |                      |

Note: If the  $p$  value is smaller than 0.05, this indicates that the difference between the two variables in the student's  $t$  test is statistically significant. Conversely, if the  $p$  value is larger than 0.05, this indicates that the difference is not statically significant (N.S.S.).

179 **Table S8.** Statistical analyses (student's  $t$  test) for the differences in  $k_{obs}$  at different pH and  
180 ionic strengths under cloud/fog-like conditions for tPtO (Figure 2 in the main text).

| tPtO                  | pH 3                  | pH 3                 | pH 5                  | pH 5                 |
|-----------------------|-----------------------|----------------------|-----------------------|----------------------|
|                       | $I_{total} = 0.002$ M | $I_{total} = 0.02$ M | $I_{total} = 0.002$ M | $I_{total} = 0.02$ M |
| pH 3                  |                       |                      |                       |                      |
| $I_{total} = 0.002$ M | /                     | N.S.S.               | $p < 0.05$            | $p < 0.05$           |
| pH 3                  |                       |                      |                       |                      |
| $I_{total} = 0.02$ M  | N.S.S.                | /                    | $p < 0.05$            | $p < 0.05$           |
| pH 5                  |                       |                      |                       |                      |
| $I_{total} = 0.002$ M | $p < 0.05$            | $p < 0.05$           | /                     | N.S.S.               |
| pH 5                  |                       |                      |                       |                      |
| $I_{total} = 0.02$ M  | $p < 0.05$            | $p < 0.05$           | N.S.S.                | /                    |

181 Note: If the  $p$  value is smaller than 0.05, this indicates that the difference between the two  
182 variables in the student's  $t$  test is statistically significant. Conversely, if the  $p$  value is larger  
183 than 0.05, this indicates that the difference is not statically significant (N.S.S.).

**Table S9.** Statistical analyses (student's  $t$  test) for the differences in  $k_{obs}$  at different pH and ionic strengths under cloud/fog-like conditions for MBO (Figure 2 in the main text).

| MBO                   | pH 3                  | pH 3                 | pH 5                  | pH 5                 |
|-----------------------|-----------------------|----------------------|-----------------------|----------------------|
|                       | $I_{total} = 0.002$ M | $I_{total} = 0.02$ M | $I_{total} = 0.002$ M | $I_{total} = 0.02$ M |
| pH 3                  | /                     | N.S.S.               | $p < 0.05$            | $p < 0.05$           |
| $I_{total} = 0.002$ M |                       |                      |                       |                      |
| pH 3                  | N.S.S.                | /                    | $p < 0.05$            | $p < 0.05$           |
| $I_{total} = 0.02$ M  |                       |                      |                       |                      |
| pH 5                  | $p < 0.05$            | $p < 0.05$           | /                     | N.S.S.               |
| $I_{total} = 0.002$ M |                       |                      |                       |                      |
| pH 5                  | $p < 0.05$            | $p < 0.05$           | N.S.S.                | /                    |
| $I_{total} = 0.02$ M  |                       |                      |                       |                      |

Note: If the  $p$  value is smaller than 0.05, this indicates that the difference between the two variables in the student's  $t$  test is statistically significant. Conversely, if the  $p$  value is larger than 0.05, this indicates that the difference is not statically significant (N.S.S.).

189 **Table S10.** Statistical analyses (student's  $t$  test) for the differences in  $Y_{SOA}$  between pH and  
190 ionic strength under cloud/fog-like conditions for cHxO (Figure 3 in the main text).

| cHxO                  | pH 3                  | pH 3                 | pH 5                  | pH 5                 |
|-----------------------|-----------------------|----------------------|-----------------------|----------------------|
|                       | $I_{total} = 0.002$ M | $I_{total} = 0.02$ M | $I_{total} = 0.002$ M | $I_{total} = 0.02$ M |
| pH 3                  | /                     | N.S.S.               | $p < 0.05$            | $p < 0.05$           |
| $I_{total} = 0.002$ M |                       |                      |                       |                      |
| pH 3                  | N.S.S.                | /                    | $p < 0.05$            | $p < 0.05$           |
| $I_{total} = 0.02$ M  |                       |                      |                       |                      |
| pH 5                  | $p < 0.05$            | $p < 0.05$           | /                     | $p < 0.05$           |
| $I_{total} = 0.002$ M |                       |                      |                       |                      |
| pH 5                  | $p < 0.05$            | $p < 0.05$           | $p < 0.05$            | /                    |
| $I_{total} = 0.02$ M  |                       |                      |                       |                      |

191 Note: If the  $p$  value is smaller than 0.05, this indicates that the difference between the two  
192 variables in the student's  $t$  test is statistically significant. Conversely, if the  $p$  value is larger  
193 than 0.05, this indicates that the difference is not statically significant (N.S.S.).

**Table S11.** Statistical analyses (student's  $t$  test) for the differences in  $Y_{SOA}$  between pH and ionic strength under cloud/fog-like conditions for tHxO (Figure 3 in the main text).

| tHxO                  | pH 3                  | pH 3                 | pH 5                  | pH 5                 |
|-----------------------|-----------------------|----------------------|-----------------------|----------------------|
|                       | $I_{total} = 0.002$ M | $I_{total} = 0.02$ M | $I_{total} = 0.002$ M | $I_{total} = 0.02$ M |
| pH 3                  |                       |                      |                       |                      |
| $I_{total} = 0.002$ M | /                     | $p < 0.05$           | N.S.S.                | $p < 0.05$           |
| pH 3                  |                       |                      |                       |                      |
| $I_{total} = 0.02$ M  | $p < 0.05$            | /                    | N.S.S.                | N.S.S.               |
| pH 5                  |                       |                      |                       |                      |
| $I_{total} = 0.002$ M | N.S.S.                | N.S.S.               | /                     | N.S.S.               |
| pH 5                  |                       |                      |                       |                      |
| $I_{total} = 0.02$ M  | $p < 0.05$            | N.S.S.               | N.S.S.                | /                    |

Note: If the  $p$  value is smaller than 0.05, this indicates that the difference between the two variables in the student's  $t$  test is statistically significant. Conversely, if the  $p$  value is larger than 0.05, this indicates that the difference is not statically significant (N.S.S.).

199 **Table S12.** Statistical analyses (student's  $t$  test) for the differences in  $Y_{SOA}$  between pH and  
200 ionic strength under cloud/fog-like conditions for tPtO (Figure 3 in the main text).

| tPtO                  | pH 3                  | pH 3                 | pH 5                  | pH 5                 |
|-----------------------|-----------------------|----------------------|-----------------------|----------------------|
|                       | $I_{total} = 0.002$ M | $I_{total} = 0.02$ M | $I_{total} = 0.002$ M | $I_{total} = 0.02$ M |
| pH 3                  | /                     | N.S.S.               | N.S.S.                | $p < 0.05$           |
| $I_{total} = 0.002$ M |                       |                      |                       |                      |
| pH 3                  | N.S.S.                | /                    | N.S.S.                | $p < 0.05$           |
| $I_{total} = 0.02$ M  |                       |                      |                       |                      |
| pH 5                  | N.S.S.                | N.S.S.               | /                     | $p < 0.05$           |
| $I_{total} = 0.002$ M |                       |                      |                       |                      |
| pH 5                  | $p < 0.05$            | $p < 0.05$           | $p < 0.05$            | /                    |
| $I_{total} = 0.02$ M  |                       |                      |                       |                      |

201 Note: If the  $p$  value is smaller than 0.05, this indicates that the difference between the two  
202 variables in the student's  $t$  test is statistically significant. Conversely, if the  $p$  value is larger  
203 than 0.05, this indicates that the difference is not statically significant (N.S.S.).

**Table S13.** Statistical analyses (student's  $t$  test) for the differences in  $Y_{SOA}$  between pH and ionic strength under cloud/fog-like conditions for MBO (Figure 3 in the main text).

| MBO                   | pH 3                  | pH 3                 | pH 5                  | pH 5                 |
|-----------------------|-----------------------|----------------------|-----------------------|----------------------|
|                       | $I_{total} = 0.002$ M | $I_{total} = 0.02$ M | $I_{total} = 0.002$ M | $I_{total} = 0.02$ M |
| pH 3                  | /                     | N.S.S.               | N.S.S.                | N.S.S.               |
| $I_{total} = 0.002$ M |                       |                      |                       |                      |
| pH 3                  | N.S.S.                | /                    | N.S.S.                | N.S.S.               |
| $I_{total} = 0.02$ M  |                       |                      |                       |                      |
| pH 5                  | N.S.S.                | N.S.S.               | /                     | N.S.S.               |
| $I_{total} = 0.002$ M |                       |                      |                       |                      |
| pH 5                  | N.S.S.                | N.S.S.               | N.S.S.                | /                    |
| $I_{total} = 0.02$ M  |                       |                      |                       |                      |

Note: If the  $p$  value is smaller than 0.05, this indicates that the difference between the two variables in the student's  $t$  test is statistically significant. Conversely, if the  $p$  value is larger than 0.05, this indicates that the difference is not statically significant (N.S.S.).

**Table S14.** Statistical analyses (student's  $t$  test) for the differences in  $k_{obs}$  at different pH and ionic strengths under aqueous aerosol-like conditions for cHxO (Figure 4 in the main text).

| cHxO                        | pH 3                | pH 3                | pH 5                | pH 5                |
|-----------------------------|---------------------|---------------------|---------------------|---------------------|
|                             | $I_{total} = 0.5$ M | $I_{total} = 3.3$ M | $I_{total} = 0.5$ M | $I_{total} = 3.3$ M |
| pH 3<br>$I_{total} = 0.5$ M | /                   | $p < 0.05$          | N.S.S.              | $p < 0.05$          |
| pH 3<br>$I_{total} = 3.3$ M | $p < 0.05$          | /                   | $p < 0.05$          | N.S.S.              |
| pH 5<br>$I_{total} = 0.5$ M | N.S.S.              | $P < 0.05$          | /                   | $p < 0.05$          |
| pH 5<br>$I_{total} = 3.3$ M | $p < 0.05$          | N.S.S.              | $p < 0.05$          | /                   |

Note: If the  $p$  value is smaller than 0.05, this indicates that the difference between the two variables in the student's  $t$  test is statistically significant. Conversely, if the  $p$  value is larger than 0.05, this indicates that the difference is not statically significant (N.S.S.).

**Table S15.** Statistical analyses (student's  $t$  test) for the differences in  $k_{obs}$  at different pH and ionic strengths under aqueous aerosol-like conditions for tHxO (Figure 4 in the main text).

| tHxO                        | pH 3                | pH 3                | pH 5                | pH 5                |
|-----------------------------|---------------------|---------------------|---------------------|---------------------|
|                             | $I_{total} = 0.5$ M | $I_{total} = 3.3$ M | $I_{total} = 0.5$ M | $I_{total} = 3.3$ M |
| pH 3<br>$I_{total} = 0.5$ M | /                   | $p < 0.05$          | N.S.S.              | $p < 0.05$          |
| pH 3<br>$I_{total} = 3.3$ M | $p < 0.05$          | /                   | $p < 0.05$          | $p < 0.05$          |
| pH 5<br>$I_{total} = 0.5$ M | N.S.S.              | $p < 0.05$          | /                   | $p < 0.05$          |
| pH 5<br>$I_{total} = 3.3$ M | $p < 0.05$          | $p < 0.05$          | $p < 0.05$          | /                   |

Note: If the  $p$  value is smaller than 0.05, this indicates that the difference between the two variables in the student's  $t$  test is statistically significant. Conversely, if the  $p$  value is larger than 0.05, this indicates that the difference is not statically significant (N.S.S.).

219 **Table S16.** Statistical analyses (student's  $t$  test) for the differences in  $k_{obs}$  at different pH and  
 220 ionic strengths under aqueous aerosol-like conditions for tPtO (Figure 4 in the main text).

| tPtO                | pH 3                | pH 3                | pH 5                | pH 5                |
|---------------------|---------------------|---------------------|---------------------|---------------------|
|                     | $I_{total} = 0.5$ M | $I_{total} = 3.3$ M | $I_{total} = 0.5$ M | $I_{total} = 3.3$ M |
| pH 3                | /                   | $p < 0.05$          | $p < 0.05$          | $p < 0.05$          |
| $I_{total} = 0.5$ M |                     |                     |                     |                     |
| pH 3                | $p < 0.05$          | /                   | $p < 0.05$          | $p < 0.05$          |
| $I_{total} = 3.3$ M |                     |                     |                     |                     |
| pH 5                | $p < 0.05$          | $p < 0.05$          | /                   | $p < 0.05$          |
| $I_{total} = 0.5$ M |                     |                     |                     |                     |
| pH 5                | $p < 0.05$          | $p < 0.05$          | $p < 0.05$          | /                   |
| $I_{total} = 3.3$ M |                     |                     |                     |                     |

221 Note: If the  $p$  value is smaller than 0.05, this indicates that the difference between the two  
 222 variables in the student's  $t$  test is statistically significant. Conversely, if the  $p$  value is larger  
 223 than 0.05, this indicates that the difference is not statically significant (N.S.S.).

**Table S17.** Statistical analyses (student's  $t$  test) for the differences in  $k_{obs}$  at different pH and ionic strengths under aqueous aerosol-like conditions for MBO (Figure 4 in the main text).

| MBO                         | pH 3                | pH 3                | pH 5                | pH 5                |
|-----------------------------|---------------------|---------------------|---------------------|---------------------|
|                             | $I_{total} = 0.5$ M | $I_{total} = 3.3$ M | $I_{total} = 0.5$ M | $I_{total} = 3.3$ M |
| pH 3<br>$I_{total} = 0.5$ M | /                   | $p < 0.05$          | $p < 0.05$          | $p < 0.05$          |
| pH 3<br>$I_{total} = 3.3$ M | $p < 0.05$          | /                   | $p < 0.05$          | $p < 0.05$          |
| pH 5<br>$I_{total} = 0.5$ M | $p < 0.05$          | $p < 0.05$          | /                   | $p < 0.05$          |
| pH 5<br>$I_{total} = 3.3$ M | $p < 0.05$          | $p < 0.05$          | $p < 0.05$          | /                   |

Note: If the  $p$  value is smaller than 0.05, this indicates that the difference between the two variables in the student's  $t$  test is statistically significant. Conversely, if the  $p$  value is larger than 0.05, this indicates that the difference is not statically significant (N.S.S.).

229 **Table S18.** Statistical analyses (student's  $t$  test) for the differences in  $Y_{SOA}$  between pH and  
 230 ionic strength under aqueous aerosol-like conditions for cHxO (Figure 5 in the main text).

| cHxO                        | pH 3                | pH 3                | pH 5                | pH 5                |
|-----------------------------|---------------------|---------------------|---------------------|---------------------|
|                             | $I_{total} = 0.5$ M | $I_{total} = 3.3$ M | $I_{total} = 0.5$ M | $I_{total} = 3.3$ M |
| pH 3<br>$I_{total} = 0.5$ M | /                   | $p < 0.05$          | N.S.S.              | $p < 0.05$          |
| pH 3<br>$I_{total} = 3.3$ M | $p < 0.05$          | /                   | $p < 0.05$          | $p < 0.05$          |
| pH 5<br>$I_{total} = 0.5$ M | N.S.S.              | $p < 0.05$          | /                   | $p < 0.05$          |
| pH 5<br>$I_{total} = 3.3$ M | $p < 0.05$          | $p < 0.05$          | $p < 0.05$          | /                   |

231 Note: If the  $p$  value is smaller than 0.05, this indicates that the difference between the two  
 232 variables in the student's  $t$  test is statistically significant. Conversely, if the  $p$  value is larger  
 233 than 0.05, this indicates that the difference is not statically significant (N.S.S.).

**Table S19.** Statistical analyses (student's  $t$  test) for the differences in  $Y_{SOA}$  between pH and ionic strength under aqueous aerosol-like conditions for tHxO (Figure 5 in the main text).

| tHxO                                | pH 3                        | pH 3                        | pH 5                        | pH 5                        |
|-------------------------------------|-----------------------------|-----------------------------|-----------------------------|-----------------------------|
|                                     | $I_{total} = 0.5 \text{ M}$ | $I_{total} = 3.3 \text{ M}$ | $I_{total} = 0.5 \text{ M}$ | $I_{total} = 3.3 \text{ M}$ |
| pH 3<br>$I_{total} = 0.5 \text{ M}$ | /                           | $p < 0.05$                  | $p < 0.05$                  | $p < 0.05$                  |
| pH 3<br>$I_{total} = 3.3 \text{ M}$ | $p < 0.05$                  | /                           | $p < 0.05$                  | N.S.S.                      |
| pH 5<br>$I_{total} = 0.5 \text{ M}$ | $p < 0.05$                  | $P < 0.05$                  | /                           | $p < 0.05$                  |
| pH 5<br>$I_{total} = 3.3 \text{ M}$ | $p < 0.05$                  | N.S.S.                      | $p < 0.05$                  | /                           |

Note: If the  $p$  value is smaller than 0.05, this indicates that the difference between the two variables in the student's  $t$  test is statistically significant. Conversely, if the  $p$  value is larger than 0.05, this indicates that the difference is not statically significant (N.S.S.).

239 **Table S20.** Statistical analyses (student's  $t$  test) for the differences in  $Y_{SOA}$  between pH and  
 240 ionic strength under aqueous aerosol-like conditions for tPtO (Figure 5 in the main text).

| tPtO                        | pH 3                | pH 3                | pH 5                | pH 5                |
|-----------------------------|---------------------|---------------------|---------------------|---------------------|
|                             | $I_{total} = 0.5$ M | $I_{total} = 3.3$ M | $I_{total} = 0.5$ M | $I_{total} = 3.3$ M |
| pH 3<br>$I_{total} = 0.5$ M | /                   | $p < 0.05$          | $p < 0.05$          | $p < 0.05$          |
| pH 3<br>$I_{total} = 3.3$ M | $p < 0.05$          | /                   | $p < 0.05$          | $p < 0.05$          |
| pH 5<br>$I_{total} = 0.5$ M | $p < 0.05$          | $p < 0.05$          | /                   | $p < 0.05$          |
| pH 5<br>$I_{total} = 3.3$ M | $p < 0.05$          | $p < 0.05$          | $p < 0.05$          | /                   |

241 Note: If the  $p$  value is smaller than 0.05, this indicates that the difference between the two  
 242 variables in the student's  $t$  test is statistically significant. Conversely, if the  $p$  value is larger  
 243 than 0.05, this indicates that the difference is not statically significant (N.S.S.).

**Table S21.** Statistical analyses (student's  $t$  test) for the differences in  $Y_{SOA}$  between pH and ionic strength under aqueous aerosol-like conditions for MBO (Figure 5 in the main text).

| MBO                         | pH 3                | pH 3                | pH 5                | pH 5                |
|-----------------------------|---------------------|---------------------|---------------------|---------------------|
|                             | $I_{total} = 0.5$ M | $I_{total} = 3.3$ M | $I_{total} = 0.5$ M | $I_{total} = 3.3$ M |
| pH 3<br>$I_{total} = 0.5$ M | /                   | $p < 0.05$          | N.S.S.              | $p < 0.05$          |
| pH 3<br>$I_{total} = 3.3$ M | $p < 0.05$          | /                   | $p < 0.05$          | N.S.S.              |
| pH 5<br>$I_{total} = 0.5$ M | N.S.S.              | $p < 0.05$          | /                   | $p < 0.05$          |
| pH 5<br>$I_{total} = 3.3$ M | $p < 0.05$          | N.S.S.              | $p < 0.05$          | /                   |

Note: If the  $p$  value is smaller than 0.05, this indicates that the difference between the two variables in the student's  $t$  test is statistically significant. Conversely, if the  $p$  value is larger than 0.05, this indicates that the difference is not statically significant (N.S.S.).

## 249    **References**

- 250    Anastasio, C. and McGregor, K. G.: Chemistry of fog waters in California's Central Valley:  
251    1. In situ photoformation of hydroxyl radical and singlet molecular oxygen, *Atmos Environ*,  
252    35, 1079-1089, 10.1016/S1352-2310(00)00281-8, 2001.
- 253    Atkinson, R. and Arey, J.: Atmospheric degradation of volatile organic compounds, *Chem*  
254    *Rev*, 103, 4605-4638, 10.1021/cr0206420, 2003.
- 255    Carrasco, N., Doussin, J. F., O'Connor, M., Wenger, J. C., Picquet-Varrault, B., Durand-  
256    Jolibois, R., and Carlier, P.: Simulation chamber studies of the atmospheric oxidation of 2-  
257    methyl-3-buten-2-ol: Reaction with hydroxyl radicals and ozone under a variety of  
258    conditions, *J Atmos Chem*, 56, 33-55, 10.1007/s10874-006-9041-y, 2007.
- 259    Chan, A. W. H., Galloway, M. M., Kwan, A. J., Chhabra, P. S., Keutsch, F. N., Wennberg, P.  
260    O., Flagan, R. C., and Seinfeld, J. H.: Photooxidation of 2-Methyl-3-Buten-2-ol (MBO) as a  
261    Potential Source of Secondary Organic Aerosol, *Environ Sci Technol*, 43, 4647-4652,  
262    10.1021/es802560w, 2009.
- 263    Cope, J. D., Bates, K. H., Tran, L. N., Abellar, K. A., and Nguyen, T. B.: Sulfur radical  
264    formation from the tropospheric irradiation of aqueous sulfate aerosols, *P Natl Acad Sci*  
265    *USA*, 119, 10.1073/pnas.2202857119, 2022.
- 266    de Semainville, P. G., Hoffmann, D., George, C., and Herrmann, H.: Study of nitrate radical  
267    (NO<sub>3</sub>) reactions with carbonyls and acids in aqueous solution as a function of temperature,  
268    *Phys Chem Chem Phys*, 9, 958-968, 10.1039/b613956f, 2007.
- 269    Gligorovski, S., Strekowski, R., Barbati, S., and Vione, D.: Environmental Implications of  
270    Hydroxyl Radicals (center dot OH), *Chemical Reviews*, 115, 13051-13092,  
271    10.1021/cr500310b, 2015.
- 272    Herrmann, H.: On the photolysis of simple anions and neutral molecules as sources of  
273    O<sup>-</sup>/OH, SO<sub>x</sub><sup>-</sup> and Cl in aqueous solution, *Physical Chemistry Chemical Physics*, 9, 3935-  
274    3964, 10.1039/B618565G, 2007.
- 275    Herrmann, H., Ervens, B., Nowacki, P., Wolke, R., and Zellner, R.: A chemical aqueous  
276    phase radical mechanism for tropospheric chemistry, *Chemosphere*, 38, 1223-1232, 1999.
- 277    Herrmann, H., Hoffmann, D., Schaefer, T., Bräuer, P., and Tilgner, A.: Tropospheric  
278    Aqueous-Phase Free-Radical Chemistry: Radical Sources, Spectra, Reaction Kinetics and  
279    Prediction Tools, *ChemPhysChem*, 11, 3796-3822, 10.1002/cphc.201000533, 2010.
- 280    Lyu, Y., Chow, J. T. C., and Nah, T.: Kinetics of the nitrate-mediated photooxidation of  
281    monocarboxylic acids in the aqueous phase, *Environ Sci-Proc Imp*, 25, 461-471,  
282    10.1039/d2em00458e, 2023.

283 Mack, J. and Bolton, J. R.: Photochemistry of nitrite and nitrate in aqueous solution: a  
 284 review, *J Photoch Photobio A*, 128, 1-13, Doi 10.1016/S1010-6030(99)00155-0, 1999.

285 Marussi, G. and Vione, D.: Secondary Formation of Aromatic Nitroderivatives of  
 286 Environmental Concern: Photonitration Processes Triggered by the Photolysis of Nitrate and  
 287 Nitrite Ions in Aqueous Solution, *Molecules*, 26, 2550, 2021.

288 Reisen, F., Aschmann, S. M., Atkinson, R., and Arey, J.: Hydroxyaldehyde products from  
 289 hydroxyl radical reactions of  
 290 -3-hexen-1-ol and 2-methyl-3-buten-2-ol quantified by SPME and API-MS, *Environ Sci*  
 291 *Technol*, 37, 4664-4671, 10.1021/es034142f, 2003.

292 Richards-Henderson, N. K., Hansel, A. K., Valsaraj, K. T., and Anastasio, C.: Aqueous  
 293 oxidation of green leaf volatiles by hydroxyl radical as a source of SOA: Kinetics and SOA  
 294 yields, *Atmos Environ*, 95, 105-112, 10.1016/j.atmosenv.2014.06.026, 2014.

295 Sander, R.: Compilation of Henry's law constants (version 5.0.0) for water as solvent,  
 296 *Atmospheric Chemistry and Physics*, 23, 10901-12440, 10.5194/acp-23-10901-2023, 2023.

297 Sarang, K., Otto, T., Rudzinski, K., Schaefer, T., Grgic, I., Nestorowicz, K., Herrmann, H.,  
 298 and Szmigielski, R.: Reaction Kinetics of Green Leaf Volatiles with Sulfate, Hydroxyl, and  
 299 Nitrate Radicals in Tropospheric Aqueous Phase, *Environ Sci Technol*, 55, 13666-13676,  
 300 10.1021/acs.est.1c03276, 2021.

301 Sarang, K., Otto, T., Gagan, S., Rudzinski, K., Schaefer, T., Brüggemann, M., Grgic, I.,  
 302 Kubas, A., Herrmann, H., and Szmigielski, R.: Aqueous-phase photo-oxidation of selected  
 303 green leaf volatiles initiated by OH radicals: Products and atmospheric implications, *Sci*  
 304 *Total Environ*, 879, 10.1016/j.scitotenv.2023.162622, 2023.

305 Scharko, N. K., Berke, A. E., and Raff, J. D.: Release of nitrous acid and nitrogen dioxide  
 306 from nitrate photolysis in acidic aqueous solutions, *Environ Sci Technol*, 48, 11991-12001,  
 307 10.1021/es503088x, 2014.

308 Yang, J., Au, W. C., Law, H., Lam, C. H., and Nah, T.: Formation and evolution of brown  
 309 carbon during aqueous-phase nitrate-mediated photooxidation of guaiacol and 5-  
 310 nitroguaiacol, *Atmos Environ*, 254, 118401, 10.1016/j.atmosenv.2021.118401, 2021.

311 Yang, J., Au, W. C., Law, H., Leung, C. H., Lam, C. H., and Nah, T.: pH affects the aqueous-  
 312 phase nitrate-mediated photooxidation of phenolic compounds: implications for brown  
 313 carbon formation and evolution, *Environ Sci Process Impacts*, 25, 176-189,  
 314 10.1039/d2em00004k, 2023.

315
